# Supplementary material for: Variants in the proteasome regulator PSMF1 cause a phenotypic spectrum from early-onset Parkinson’s disease to perinatal lethality and disrupt mitochondrial function
Source: PubMed Central journal article supplement — medRxiv. 2025 Jul 21:2024.06.19.24308302. Originally published 2024 Jun 20. Preprint. [Version 2] doi: 10.1101/2024.06.19.24308302 (PMC11326324; doi:10.1101/2024.06.19.24308302), 2025-07-21
Supplement: media-1.pdf [file media-1.pdf]

## SUPPLEMENTARY FILES

### ***PSMF1* variants cause a phenotypic spectrum from early-onset Parkinson's disease to perinatal lethality by disrupting mitochondrial pathways**

Francesca Magrinelli, Christelle Tesson,\* Plamena R. Angelova,\* Ainara Salazar-Villacorta,\* Jose A. Rodriguez,\* Annarita Scardamaglia,\* Brian Hon-Yin Chung,\* Matthew Jaconelli, Barbara Vona, Noemi Esteras, Anna Ka-Yee Kwong, Thomas Courtin, Reza Maroofian, Shahryar Alavi, Raja Nirujogi, Mariasavina Severino, Patrick A. Lewis, Stephanie Efthymiou, Benjamin O'Callaghan, Rebecca Buchert, Linda Sofan, Pawel Lis, Chloé Pinon, Guido J. Breedveld, Martin Man-Chun Chui, David Murphy, Vanessa Pitz, Mary B. Makarios, Marlene Cassar, Bassem A. Hassan, Sana Iftikhar, Clarissa Rocca, Peter Bauer, Michele Tinazzi, Marina Svetel, Bedia Samanci, Haşmet A. Hanağası, Basar Bilgiç, José A. Obeso, Monica M. Kurtis, Guillaume Cogan, Ayşe Nazlı Başak, Güneş Kiziltan, Tuğçe Gül, Gül Yalçın, Bülent Elibol, Nina Barišić, Earny Wei-Sen Ng, Sze-Shing Fan, Tova Hershkovitz, Karin Weiss, Javeria Raza Alvi, Tipu Sultan, Issam Azmi Alkhawaja, Tawfiq Froukh, Hadeel Abdollah E Alrukban, Christine Fauth, Ulrich A. Schatz, Thomas Zöggeler, Michael Zech, Karen Stals, Vinod Varghese, Sonia Gandhi, Cornelis Blauwendraat, John A. Hardy, Suzanne Lesage, Vincenzo Bonifati, Tobias B. Haack, Aida M. Bertoli-Avella, Robert Steinfeld, Dario R. Alessi, Hermann Steller,<sup>°</sup> Alexis Brice,<sup>°</sup> Andrey Y. Abramov<sup>^</sup>, Kailash P. Bhatia<sup>^</sup>, Henry Houlden<sup>^</sup>

\* *These Authors contributed equally.*

<sup>°</sup> *These Authors contributed equally.*

<sup>^</sup> *These Authors jointly supervised this work.*

## Supplementary File 1. Pathogenicity predictions and computational analysis of 14 *PSMF1* variants detected in the study cohort

### A. *PSMF1* non-splice variants

|     | Variant <i>PSMF1</i> (GRCh38/hg38) [NM_006814.5]   | gnomAD v2.1.1/v3.1.2/v4.0.0 (het, hom, allele frequency)                                                                     | CADD | PolyPhen2 HVAR                   | SIFT4G                                       | PROVEAN                                                         | MutationTaster                            | HSF                                                                                                                                                                                           | GERP (Franklin Genoox) | GERP (UCSC) |
|-----|----------------------------------------------------|------------------------------------------------------------------------------------------------------------------------------|------|----------------------------------|----------------------------------------------|-----------------------------------------------------------------|-------------------------------------------|-----------------------------------------------------------------------------------------------------------------------------------------------------------------------------------------------|------------------------|-------------|
| V1  | chr20:1164436:C>G<br>c.724C>G<br>p.(Arg242Gly)     | v2.1.1: 7 het, 0 hom, $f = 0.00002787$<br>v3.1.2: not found<br>v4.0.0: 5 het, 0 hom, $f = 0.000003420$                       | 27.4 | Possibly damaging (score: 0.997) | Damaging (0, 0, 0)                           | Damaging (-6.3, -6.3, -6.3, -3.21)                              | Disease causing (prob: 0.999978910569413) | No significant impact on splicing signals                                                                                                                                                     | 4.13                   | 4.13        |
| V3  | chr20:1164436:C>T<br>c.724C>T<br>p.(Arg242Cys)     | v2.1.1: 2 het, 0 hom, $f = 0.000007964$<br>v3.1.2: 3 het, 0 hom, $f = 0.00001972$<br>v4.0.0: 8 het, 0 hom, $f = 0.000004956$ | 31   | Possibly damaging (score: 0.999) | Damaging (0, 0, 0)                           | Damaging (-7.21, -7.21, -7.21, -4.01)                           | Disease causing (prob: 0.999999926286941) | Alteration of auxiliary sequences: Significant alteration of ESE / ESS motifs ratio (-5)                                                                                                      | 4.13                   | 4.13        |
| V4  | chr20:1164437:G>A<br>c.725G>A<br>p.(Arg242His)     | v2.1.1: 427 het, 0 hom, $f = 0.001511$<br>v3.1.2: 224 het, 0 hom, $f = 0.001472$<br>v4.0.0: 3454 het, 4 hom, $f = 0.002140$  | 32   | Possibly damaging (0.858)        | Damaging (0, 0, 0)                           | Damaging, Damaging, Damaging, Neutral (-4.5, -4.5, -4.5, -2.22) | Disease causing (prob: 0.999993833789465) | No significant impact on splicing signals                                                                                                                                                     | 5.11                   | 5.11        |
| V5  | chr20:1125525:C>A<br>c.157C>A<br>p.(Leu53Met)      | v2.1.1: not found<br>v3.1.2: not found<br>v4.0.0: not found                                                                  | 23.2 | Possibly damaging (score: 0.967) | Tolerated (0.226, 0.226, 0.226, 0.226)       | Neutral (-1.15, -1.25, -1.05, -1.15)                            | Disease causing (prob: 0.999846573719514) | No significant impact on splicing signals                                                                                                                                                     | 4.93                   | 4.93        |
| V6  | chr20:1164394:C>G<br>c.682C>G<br>p.(Leu228Val)     | v2.1.1: not found<br>v3.1.2: not found<br>v4.0.0: not found                                                                  | 22.3 | Possibly damaging (score: 0.967) | Tolerated (0.228, 0.481, 0.228)              | Neutral (-0.33, -0.36, -0.33)                                   | Disease causing (prob: 0.988685291987796) | No significant impact on splicing signals                                                                                                                                                     | 6.07                   | 6.07        |
| V7  | chr20:1164403:C>T<br>c.691C>T<br>p.(Arg231*)       | v2.1.1: not found<br>v3.1.2: not found<br>v4.0.0: 4 het, 0 hom, $f = 0.000002736$                                            | 37   | N/A                              | N/A                                          | N/A                                                             | Disease causing (prob: 1)                 | Alteration of auxiliary sequences: Significant alteration of ESE / ESS motifs ratio (-3)                                                                                                      | 5.13                   | 5.13        |
| V11 | chr20:118774:A>T<br>c.1A>T<br>p.(0)                | v2.1.1: 1 het, 0 hom, $f = 0.000004074$<br>v3.1.2: not found<br>v4.0.0: 1 het, 0 hom, $f = 6.866e-7$                         | 24.5 | Possibly damaging (score: 0.970) | Tolerated/ Damaging (0.278, 0, 0.259, 0.278) | Neutral (-1.18, -1.14, -1.24, -1.18)                            | Disease causing (prob: 1)                 | Alteration of auxiliary sequences: Significant alteration of ESE / ESS motifs ratio (-6)                                                                                                      | 4.61                   | 4.61        |
| V12 | chr20:118872:CG>C<br>c.101del<br>p.(Gly34Valfs*47) | v2.1.1: not found<br>v3.1.2: 1 het, 0 hom, $f = 0.000006568$<br>v4.0.0: 4 het, 0 hom, $f = 0.000002478$                      | N/A  | N/A                              | N/A                                          | N/A                                                             | Disease causing (prob: 1)                 | Alteration of auxiliary sequences: Significant alteration of ESE / ESS motifs ratio (-2)<br>New Donor splice site: Activation of a cryptic Donor site. Potential alteration of splicing (HSF) | N/A                    | 4.26        |

### B. *PSMF1* splice variants

|     | Variant <i>PSMF1</i> (GRCh38/hg38) [NM_006814.5] | gnomAD v2.1.1/v3.1.2/v4.0.0 (het, hom, allele frequency)                                                                      | CADD | MutationTaster            | HSF                                                                                                         | SpliceSiteFinder-like [0-100] | MaxEntScan [0-12] | NNSPLICE [0-1] | GeneSplicer [0-24] | SpliceAI $\geq 0.2$ [0.5 0.8] | AbSplice $\geq 0.01$ [0.05 0.2] | GERP (Franklin Genoox) | GERP (UCSC) |
|-----|--------------------------------------------------|-------------------------------------------------------------------------------------------------------------------------------|------|---------------------------|-------------------------------------------------------------------------------------------------------------|-------------------------------|-------------------|----------------|--------------------|-------------------------------|---------------------------------|------------------------|-------------|
| V2  | chr20:1125652:T>A<br>c.282+2T>A                  | v2.1.1: 1 het, 0 hom, $f = 0.000004052$<br>v3.1.2: not found<br>v4.0.0: not found                                             | 35   | Disease causing (prob: 1) | Broken WT Donor Site: Alteration of the WT Donor site, most probably affecting splicing (site donor broken) | -100%                         | -100%             | -100%          | -100%              | 0.95 DG (15)<br>1.00 DL (-2)  | 0.33                            | 4.93                   | 4.93        |
| V8  | chr20:1125655:G>A<br>c.282+5G>A                  | v2.1.1: 4 het, 0 hom, $f = 0.00001448$<br>v3.1.2: 1 het, 0 hom, $f = 0.000006571$<br>v4.0.0: 9 het, 0 hom, $f = 0.000005597$  | 29.3 | Disease causing (prob: 1) | Broken WT Donor Site: Alteration of the WT Donor site, most probably affecting splicing (site donor broken) | -13.9%                        | -65.1%            | -100%          | -100%              | 0.89 DG (12)<br>0.96 DL (-5)  | 0.27                            | N/A                    | 0.225       |
| V9  | chr20:1163184:G>A<br>c.605+1G>A                  | v2.1.1: 5 het, 0 hom, $f = 0.00001990$<br>v3.1.2: 1 het, 0 hom, $f = 0.000006570$<br>v4.0.0: 23 het, 0 hom, $f = 0.00001425$  | 35   | Disease causing (prob: 1) | Broken WT Donor Site: Alteration of the WT Donor site, most probably affecting splicing (site donor broken) | -100%                         | -100%             | -100%          | -100%              | 0.99 DL (-1)                  | 0.36                            | 5.36                   | 5.36        |
| V10 | chr20:1164481:G>A<br>c.764+5G>A                  | v2.1.1: 2 het, 0 hom, $f = 0.000007979$<br>v3.1.2: 2 het, 0 hom, $f = 0.00001314$<br>v4.0.0: 23 het, 0 hom, $f = 0.000008055$ | 24.4 | Disease causing (prob: 1) | Broken WT Donor Site: Alteration of the WT Donor site, most probably affecting splicing (site donor broken) | -100%                         | -56.5%            | -56.2%         | -58.9%             | 0.34 DG (11)<br>0.78 DL (-5)  | 0.31                            | N/A                    | 5.95        |
| V13 | chr20:1118904:T>C<br>c.129+2T>C                  | v2.1.1: not found<br>v3.1.2: not found<br>v4.0.0: 8 het, 0 hom, $f = 0.000005473$                                             | 34   | Disease causing (prob: 1) | Broken WT Donor Site: Alteration of the WT Donor site, most probably affecting splicing (site donor broken) | -2.5%                         | -100%             | -100%          | -100%              | 0.99 DL (-2)                  | 0.14                            | 3.96                   | 3.96        |
| V14 | chr20:1127510:T>C<br>c.365+2T>C                  | v2.1.1: not found<br>v3.1.2: not found<br>v4.0.0: 5 het, 0 hom, $f = 0.000003505$                                             | 33   | Disease causing (prob: 1) | Broken WT Donor Site: Alteration of the WT Donor site, most probably affecting splicing (site donor broken) | 0%                            | -100%             | -100%          | -100%              | 0.99 DL (-2)                  | 0.22                            | 4.53                   | 4.53        |

**Legend:** CADD = Combined Annotation Dependent Depletion (<https://cadd.gs.washington.edu/snv>); ESE = Exonic Splicing Enhancer; ESS = Exonic Splicing Silencer;  $f$  = gnomAD allele frequency; GERP = Genomic Evolutionary Rate Profiling (<http://mendel.stanford.edu/SidowLab/downloads/gerp/>); GERP (UCSC) = Genomic Evolutionary Rate Profiling by University of California, Santa Cruz ([https://genome.ucsc.edu/cgi-bin/hgTrackUi?db=hg19&g=allHg19RS\\_BW](https://genome.ucsc.edu/cgi-bin/hgTrackUi?db=hg19&g=allHg19RS_BW)); gnomAD = The Genome Aggregation Database (<https://gnomad.broadinstitute.org/>); GRCh38/hg38 = Genome Reference Consortium Human Build 38 Organism: Homo sapiens (human); het = heterozygous entries; hom = homozygous entries; HSF = Human Splicing Finder (<https://hsf.genomnis.com/home>); MutationTaster = <http://www.mutationtaster.org/>; N/A = not applicable/not available; PolyPhen-2 HVAR: Polymorphism Phenotyping v2, HumVar model (<http://genetics.bwh.harvard.edu/pph2/>); Prob = probability; PROVEAN: Protein Variation Effect Analyzer (<http://provean.jcvi.org/index.php>); SIFT 4G: Sorting Intolerant From Tolerant Databases for Genome ([https://sift.bii.a-star.edu.sg/sift4g/public/Homo\\_sapiens/](https://sift.bii.a-star.edu.sg/sift4g/public/Homo_sapiens/)); WT = wild type. # indicates *PSMF1* variants (NM\_006814.5) displayed with different font colors (Fig. 1a-2a).

Supplementary File 2. Autozygosity mapping of probands carrying homozygous *PSMF1* variants and their relatives

### Pedigree B

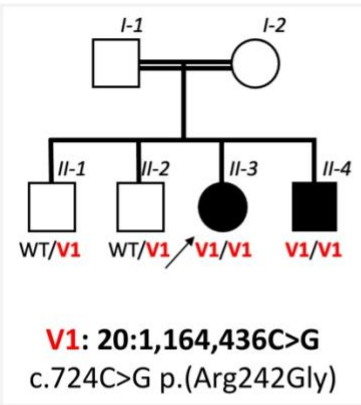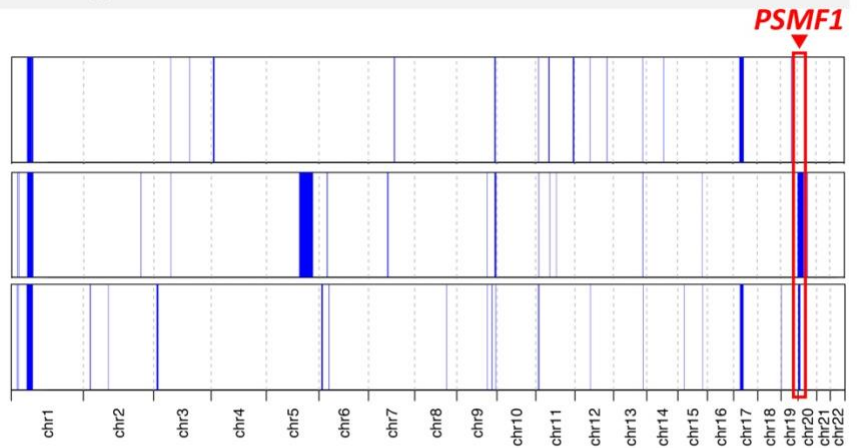

### Pedigree C

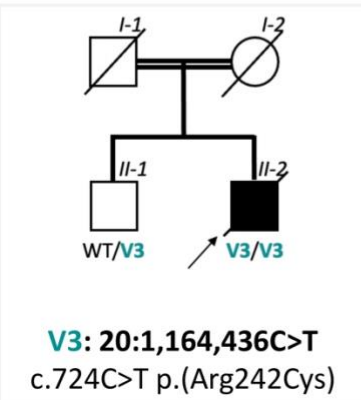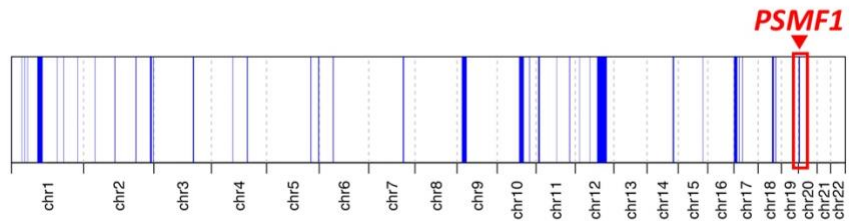

### Pedigree D

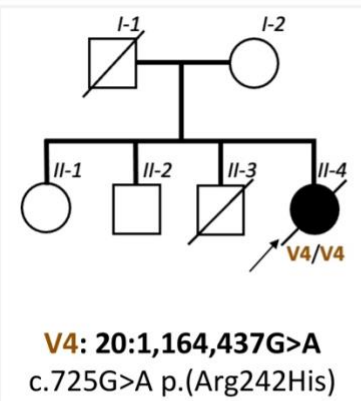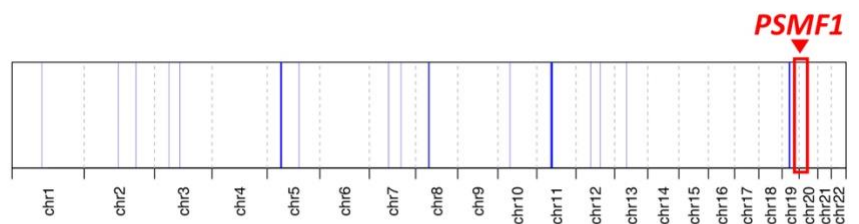

### Pedigree E

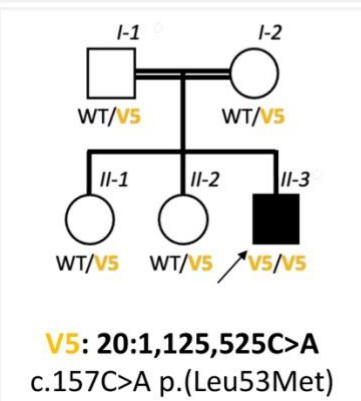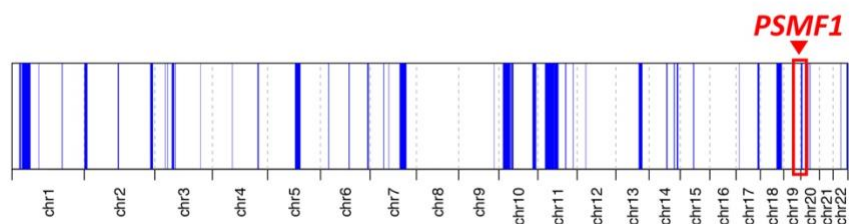

## Pedigree F

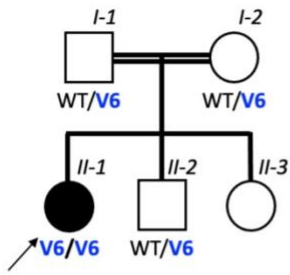

**V6: 20:1,164,394C>G**  
 c.682C>G p.(Leu228Val)

**F-II-1**  
 ROH = 234.53 Mb  
 20:96,321-10,038,445

**F-II-2**  
 ROH = 39.56 Mb

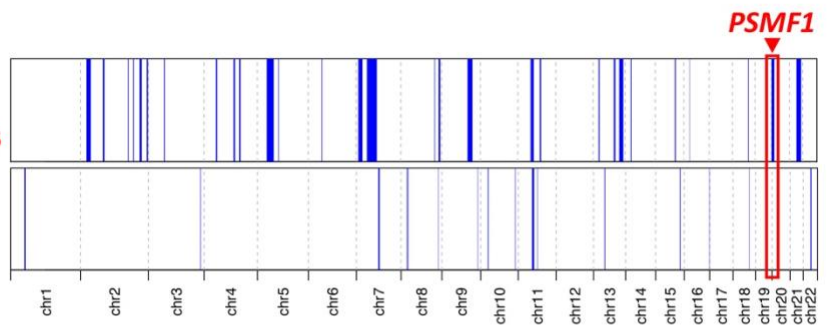

## Pedigree H

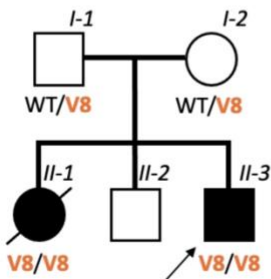

**V8: 20:1,125,655G>A**  
 c.282+5G>A

**H-II-3**  
 ROH = 106.13 Mb

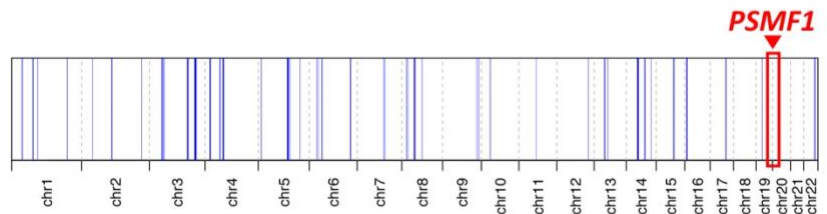

## Pedigree J

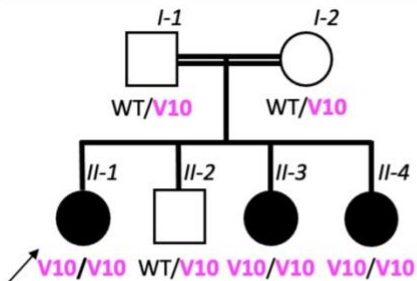

**V10: 20:1,164,481G>A**  
 c.764+5G>A

**J-II-1**  
 ROH = 227.47 Mb  
 20:96,321-7,779,059

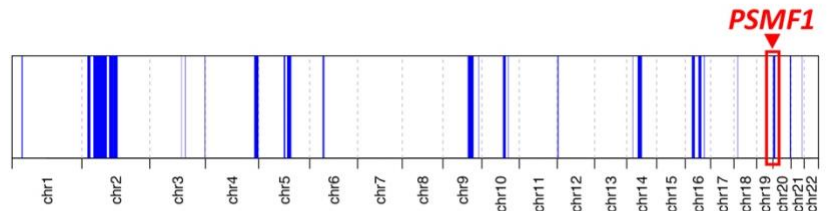

## Pedigree K

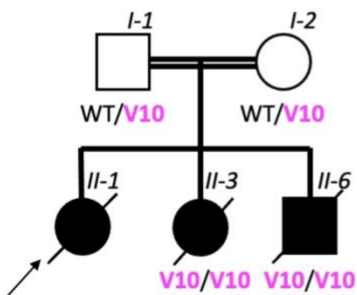

**V10: 20:1,164,481G>A**  
 c.764+5G>A

**K-II-3**  
 ROH = 111.18 Mb  
 20:96,321-1,927,653

**K-II-6**  
 ROH = 167 Mb  
 20:96,321-1,927,734

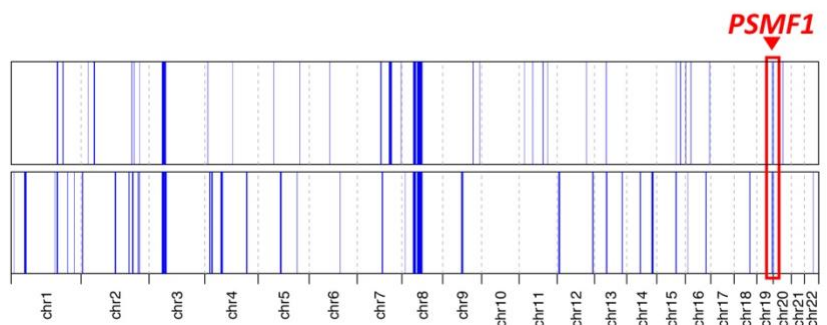

## Pedigree L

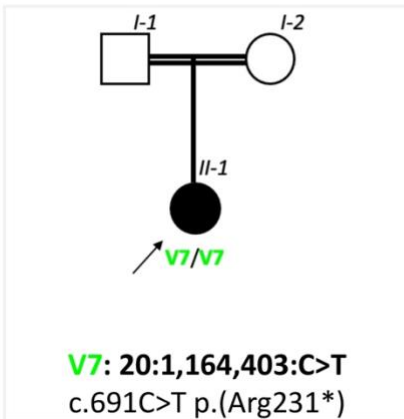

**L-II-1**  
ROH = 255.94 Mb  
**20:96,321-3,231,073**

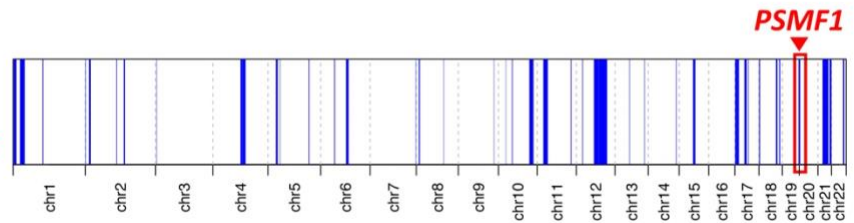

## Pedigree M

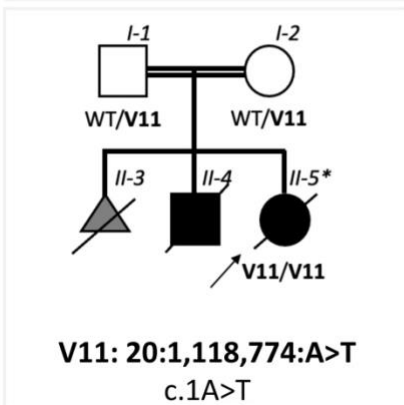

**M-II-5**  
ROH = 58.56 Mb  
**20:76,962-1,424,303**

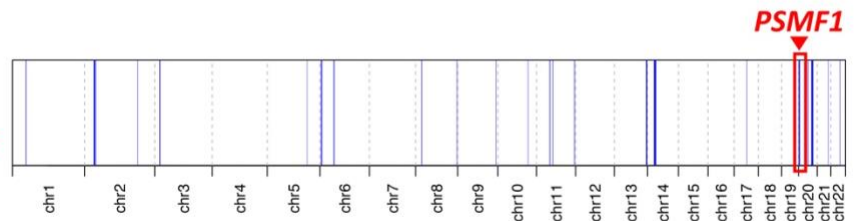

**Legend:** Autozygosity mapping using the tool AutoMap<sup>1</sup> identified regions of homozygosity (ROHs) larger than 2 Mb in all probands carrying homozygous *PSMF1* variants and their family members with raw data from exome or genome sequencing (VCF or FASTQ files) available. Proband of Pedigree I (I-II-3) was excluded from autozygosity mapping as raw data from exome sequencing were not traceable. Simplified pedigrees and genomic coordinates (GRCh38/hg38) of *PSMF1* variants segregating in the families are displayed on the left as a reference. V# indicates *PSMF1* variants referenced to *PSMF1* transcript NM\_006814.5 and displayed with different font colors (see Fig. 1a-2a). Regions of homozygosity identified in single individuals are shown in blue, with their total genomic extension across autosomes (in Mb) reported in the middle part of each panel. ROHs containing *PSMF1* are marked with red boxes and arrowheads, with their genomic coordinates in single individuals displayed in red. GRCh38/hg38 = Genome Reference Consortium Human Build 38 Organism: Homo sapiens (human); Mb = megabase(s); ROH = region of homozygosity. **Fully identifying pedigrees are available upon request to the corresponding author.**

**Supplementary File 3. Haplotype analysis of the splice variant NM\_006814.5(*PSMF1*):c.764+5G>A found in the homozygous state in the proband of Pedigrees J-K**

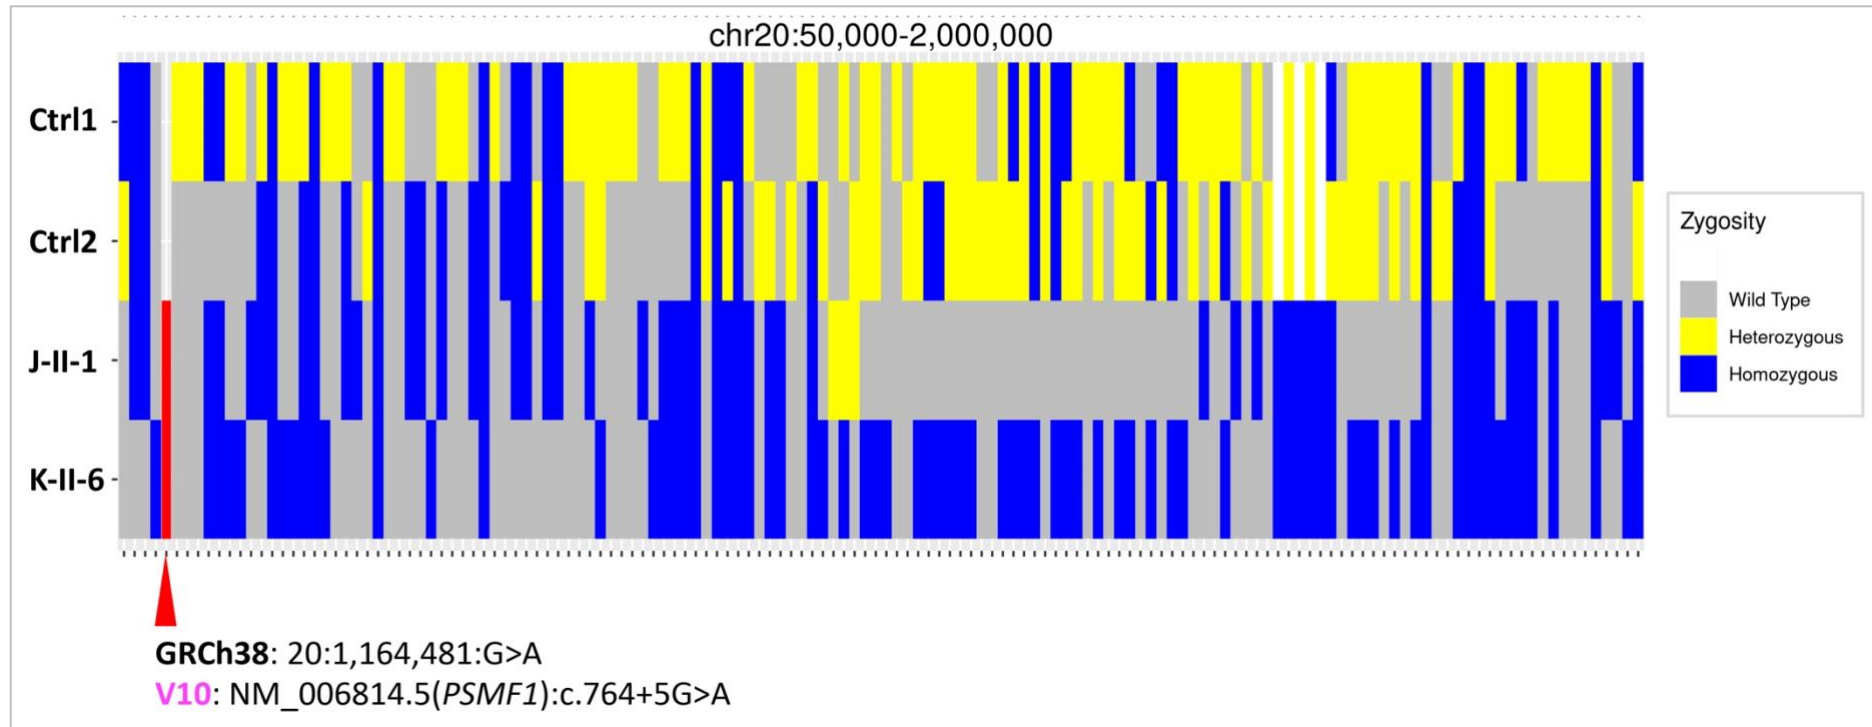

**Legend:** Haplotype analysis of the *PSMF1* splice variant NM\_006814.5:c.764+5G>A which was detected in the homozygous state in the probands of Pedigrees J (J-II-1) and K (K-II-6; Fig.1a). Color banding identifies the *PSMF1* variant under investigation in red, homozygous variants in blue, heterozygous variants in yellow and wild-type bases in gray. Different pattern of variants flanking the above-mentioned *PSMF1* variant suggests that this mutational event is recurrent rather than inherited from a common ancestor. Genomic coordinates are based on the human reference genome assembly GRCh38/hg38. Ctrl = control; GRCh38/hg38 = Genome Reference Consortium Human Build 38 Organism: Homo sapiens (human).

#### Supplementary File 4. AlphaFold modelling of PSMF1 and FBXO7

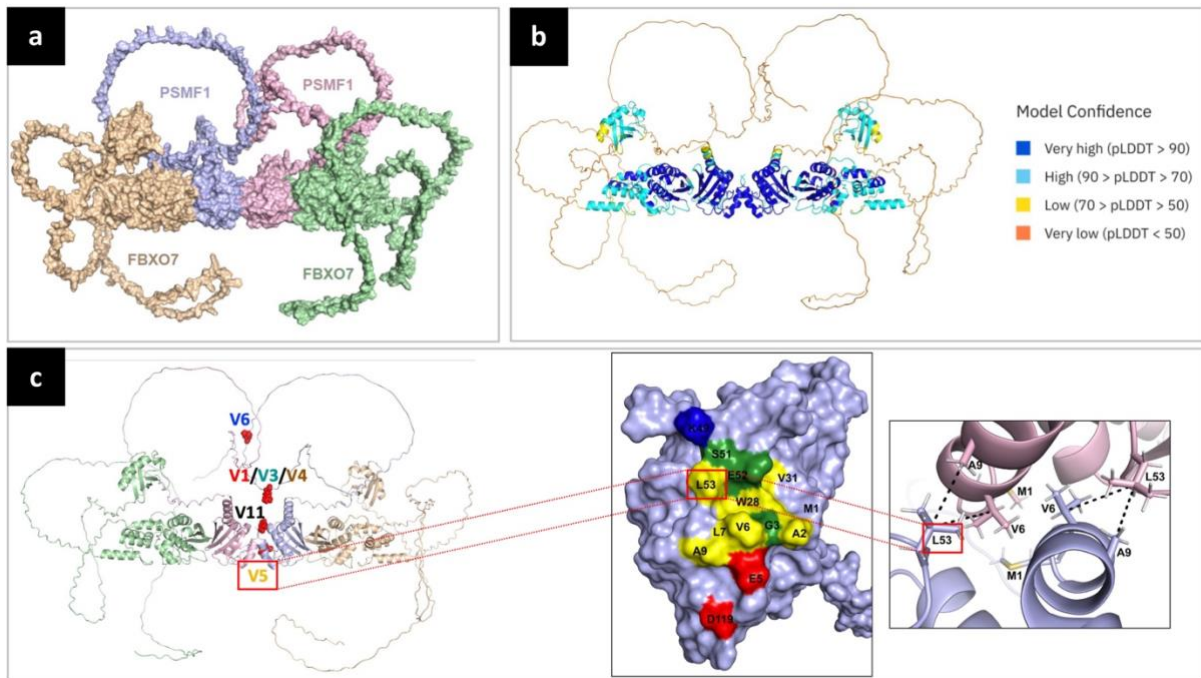

**Legend:** (a) AlphaFold modelling of PSMF1 (UniProt: Q92530) and FBXO7 (Q9Y3I1-1) binding predicted that these two proteins form a heterotetramer. The predicted structures of the models obtained were visualized and analyzed using PyMOL 2.5.5. Predictions consistently showed the same heterodimerization interfaces engaged in binding between PSMF1 and FBXO7 as well as the same homodimerization interfaces of PSMF1, with (b) very high pLDDT scores. When analyzing *PSMF1* missense and start-loss variants identified in the study cohort, none of the affected amino acid residues lies at the interface of PSMF1 and FBXO7 binding, which makes unlikely for these variants to impact the PSMF1-FBXO7 interaction. The residues p.Leu228 and p.Arg242 are located within the disordered C-terminal region of PSMF1, which makes their impact on binding other proteins difficult to predict. On the contrary, (c) the residue p.Leu53 sits on the dimerization interface of PSMF1, forming direct hydrophobic interactions with the residues p.Val6 and p.Ala9 of the second PSMF1 monomer. Based on this prediction, the PSMF1 residue p.Leu53Met (V5 in Fig.1a and Supplementary File 1; Fig.2) identified in Pedigree E could disrupt the binding within the PSMF1 homodimer.

### Supplementary File 5. Frequency of *PSMF1* variants in the UK Biobank and the Accelerating Medicines Partnership program for Parkinson's disease (AMP-PD) and gene burden analysis

We searched for *PSMF1* missense (nonsynonymous, nonframeshift indels) and loss-of-function (splice, nonsense, frameshift) variants in the whole-exome sequencing data within the UK Biobank (UKB, (<https://www.ukbiobank.ac.uk/>)<sup>2</sup> and in the whole-genome sequencing data within the Accelerating Medicines Partnership-Parkinson's Disease Initiative (AMP-PD, <https://amp-pd.org/>).<sup>3</sup> By setting minor allele frequency (MAF) <0.005, we were able to capture most *PSMF1* variants, as documented by the histograms below.

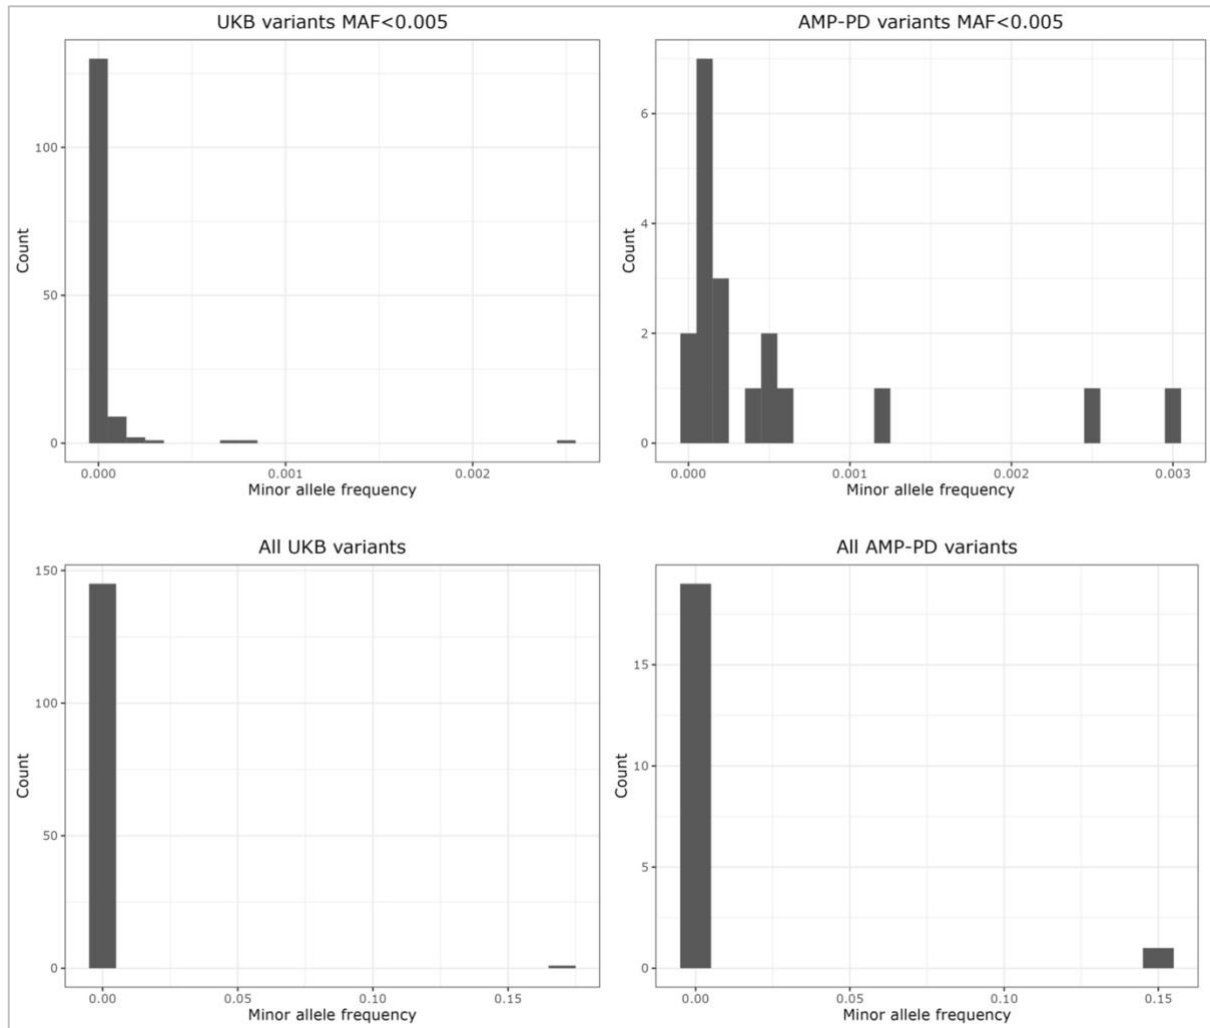

*PSMF1* was not significantly associated with Parkinson's disease (PD) in the UKB whole-exome sequencing data and the AMP-PD whole-genome sequencing data, and gene burden analysis revealed that all p values for *PSMF1* in the different categories were >0.05 (not statistically significant).

In UKB, 45,857 people were included (38,051 controls, 1,105 cases, and 6,701 proxies comprised of 6,033 parents and 668 siblings). Using a MAF limit of 0.005, we found 131 missense and 14 loss-of-function variants in *PSMF1*. Single variant association testing (using the --model flag), revealed no association with PD in a recessive model. Specifically, we identified 2 individuals who were homozygotes for a *PSMF1* non-reference allele (genotype=2) in 1/131 variants. Those 2 individuals were 2 controls and 0 cases, resulting in a frequency of 1 for controls. In addition, 560 individuals carried heterozygous non-reference alleles for 1/131 variants, and 2 individuals were heterozygotes for 2/131 variants. Overall, these 562 heterozygous carriers consist of 468 controls and 94 cases, resulting in a frequency of 0.83 for controls and 0.17 for cases, resulting in a 0.66 difference between cases and controls. Using the Sequencing Kernel Association optimal unified test (Skat-O), Combined Multivariate and



Collapsing (CMC) Wald test and CMC burden testing, *PSMF1* resulted in non-significant p values (all *PSMF1* missense variants as defined by ANNOVAR: 0.91 for Skat-O, 0.84 for CMCWald, and 0.84 for CMC; all *PSMF1* missense variants as defined by SnpEff: 0.91 for Skat-O, 0.84 for CMCWald, and 0.84 for CMC). As for *PSMF1* loss-of-function variants in the UKB dataset, we did not identify any homozygous individual for *PSMF1* non-reference alleles in any of the 14 variants. There were 14 heterozygous individuals for 1/19 variants in *PSMF1*. Those 14 heterozygous carriers consisted of 12 controls and 2 cases, resulting in a frequency of 0.86 for controls and 0.14 for cases, corresponding to a 0.72 difference between cases and controls. Using Skat-O, CMCWald, and CMC burden testing, *PSMF1* resulted in non-significant p values (all *PSMF1* loss-of-function variants as defined by ANNOVAR: 0.78 for Skat-O, 0.98 for CMCWald, and 0.98 for CMC; all *PSMF1* loss-of-function variants as defined by SnpEff: 0.48 for Skat-O, 0.30 for CMCWald, and 0.30 for CMC).

In the AMP-PD, 4,007 people were included (2,556 controls, 1,451 cases). Using an upper MAF of 0.005, we found 19 *PSMF1* missense and no *PSMF1* loss-of-function variants. Single variant association testing (using the --model flag) revealed no associations with PD in a recessive model. As for *PSMF1* variants, we did not identify any individual with a homozygous *PSMF1* non-reference allele in 19 missense variants detected, whereas 83 individuals were heterozygous for 1/19 variants. Those in total 83 heterozygous carriers consisted of 51 controls and 32 cases, resulting in a frequency of 0.61 for controls and 0.39 for cases, thus corresponding to a 0.22 difference between cases and controls. Using Skat-O, CMCWald, and CMC burden testing, *PSMF1* resulted in non-significant p values (all *PSMF1* missense variants as defined by ANNOVAR: 0.21 for Skat-O, 0.95 for CMCWald, and 0.95 for CMC; all *PSMF1* missense variants as defined by SnpEff: 0.27 for Skat-O, 0.572 for CMCWald, and 0.72 for CMC).

**Supplementary File 6. TdTomato (red) expression as marker of recombination in brain regions of *Psmf1<sup>fl/fl</sup>* Ai14 UBC-Cre-ERT2 mice**

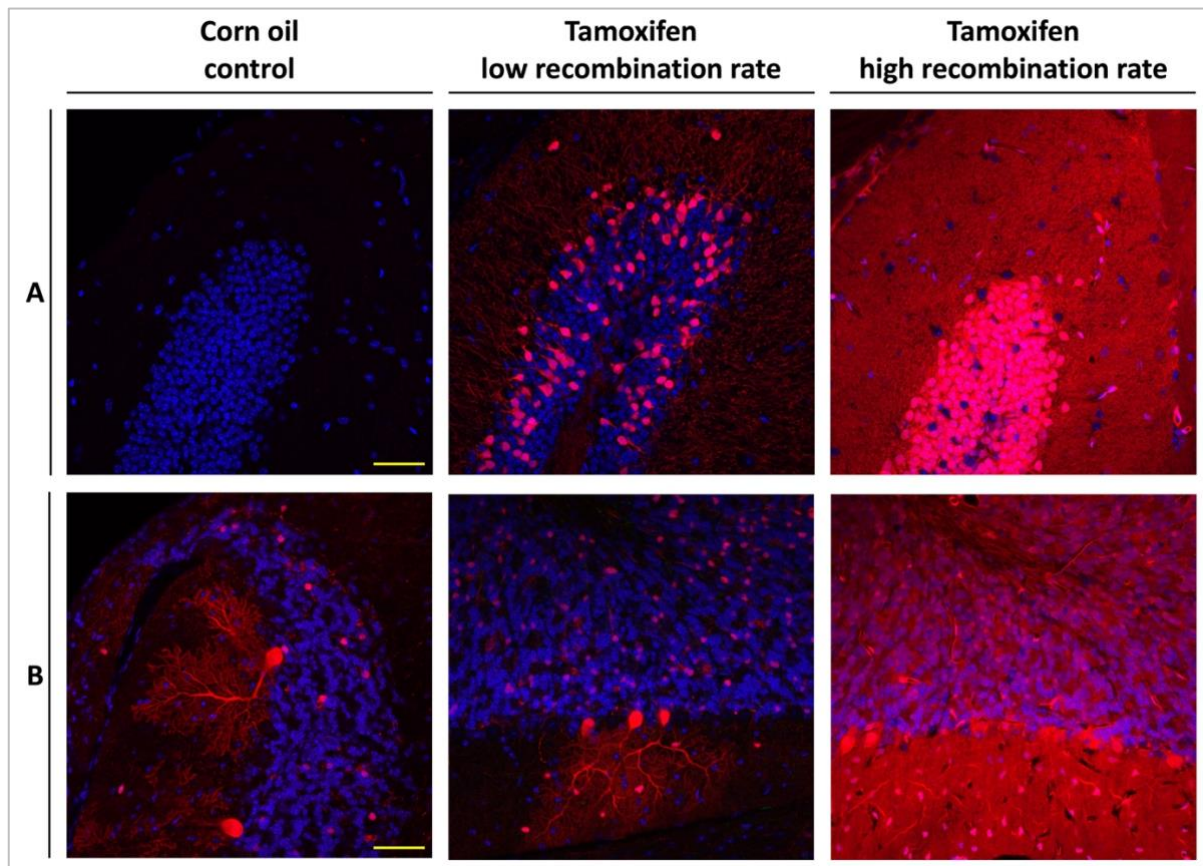

**Legend:** Tamoxifen-induced recombination in *Psmf1<sup>fl/fl</sup>* Ai14 UBC-Cre-ERT2 mice induces tdTomato (red) expression, which marks cells in which *Psmf1* is inactivated. Nuclei are stained with Hoechst 33342 (blue). Panels from left to right: control (corn oil), low recombination (tamoxifen; 30-50%) and high recombination (tamoxifen; ~90%). (A) Hippocampus; (B) Cerebellum. Scale bars indicate 50  $\mu$ m.

Supplementary File 7. Immunohistochemistry of different brain regions of *Psmf1*<sup>fl/fl</sup> Ai14 UBC-Cre-ERT2 mice 28 days after tamoxifen injection

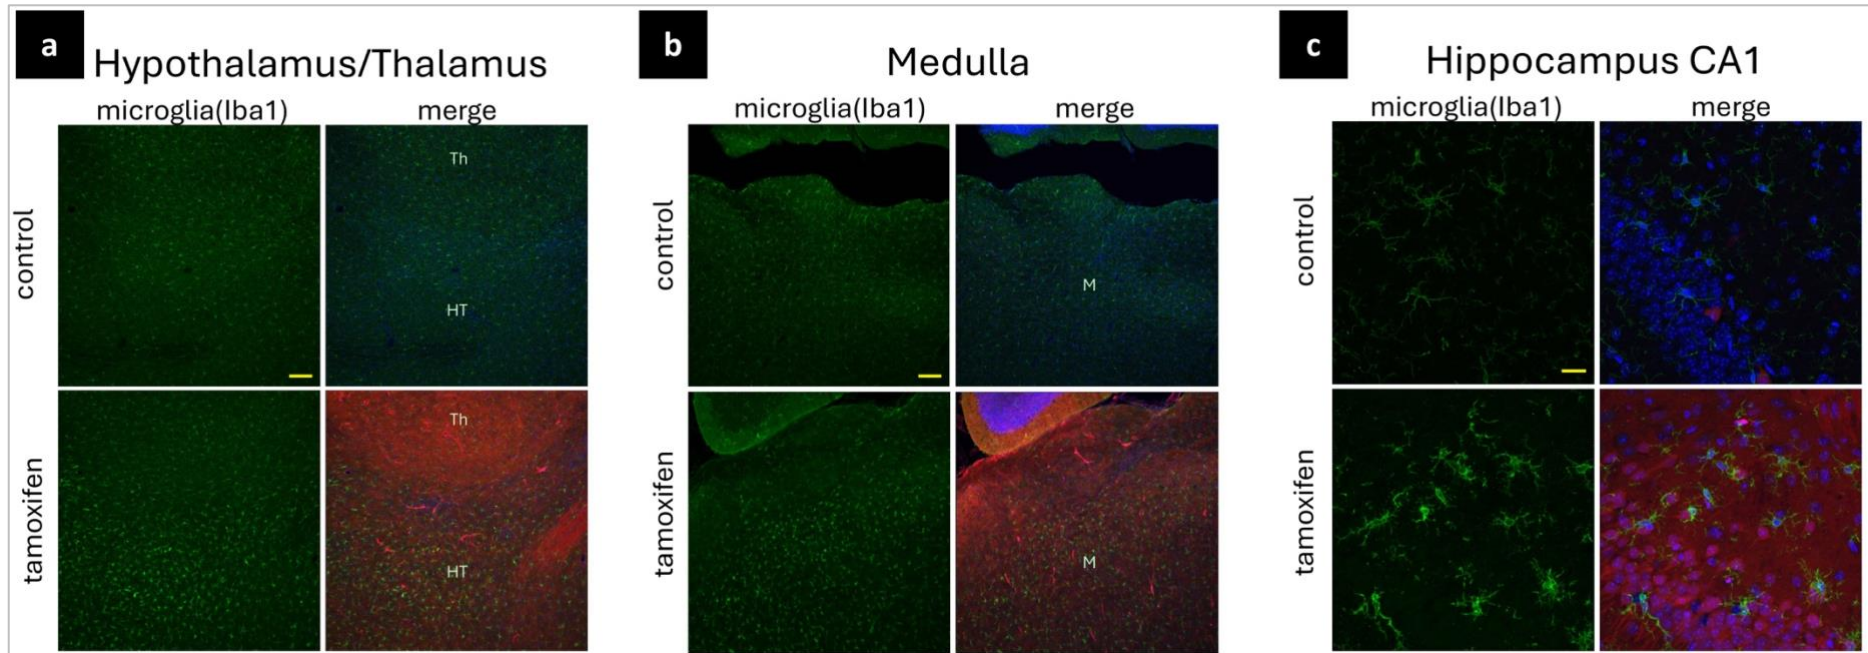

**Legend:** *Psmf1*<sup>fl/fl</sup> Ai14 UBC-Cre-ERT2 mice were injected with either corn oil (control) or tamoxifen to induce Cre recombination of floxed *Psmf1* exon 3 for loss of *Psmf1* and a stop cassette in Ai14 for expression of tdTomato (red) to evaluate recombination efficiency. Mice were sacrificed 28 days after tamoxifen injection. Sagittal brain sections were stained with Iba1 (green) for microglia and Hoechst 33342 for nuclei (blue). An increase in reactive microglia was found in the (a) hypothalamus (HT) and (b) medulla (M) (scale bar 100  $\mu$ m) as well as in the (c) hippocampus CA1 (scale bar 20  $\mu$ m). Th = thalamus.

**Supplementary File 8. Immunohistochemistry of the substantia nigra and ventral tegmental area of *Psmf1<sup>fl/fl</sup>* Ai14 UBC-Cre-ERT2 mice 28 days after tamoxifen injection**

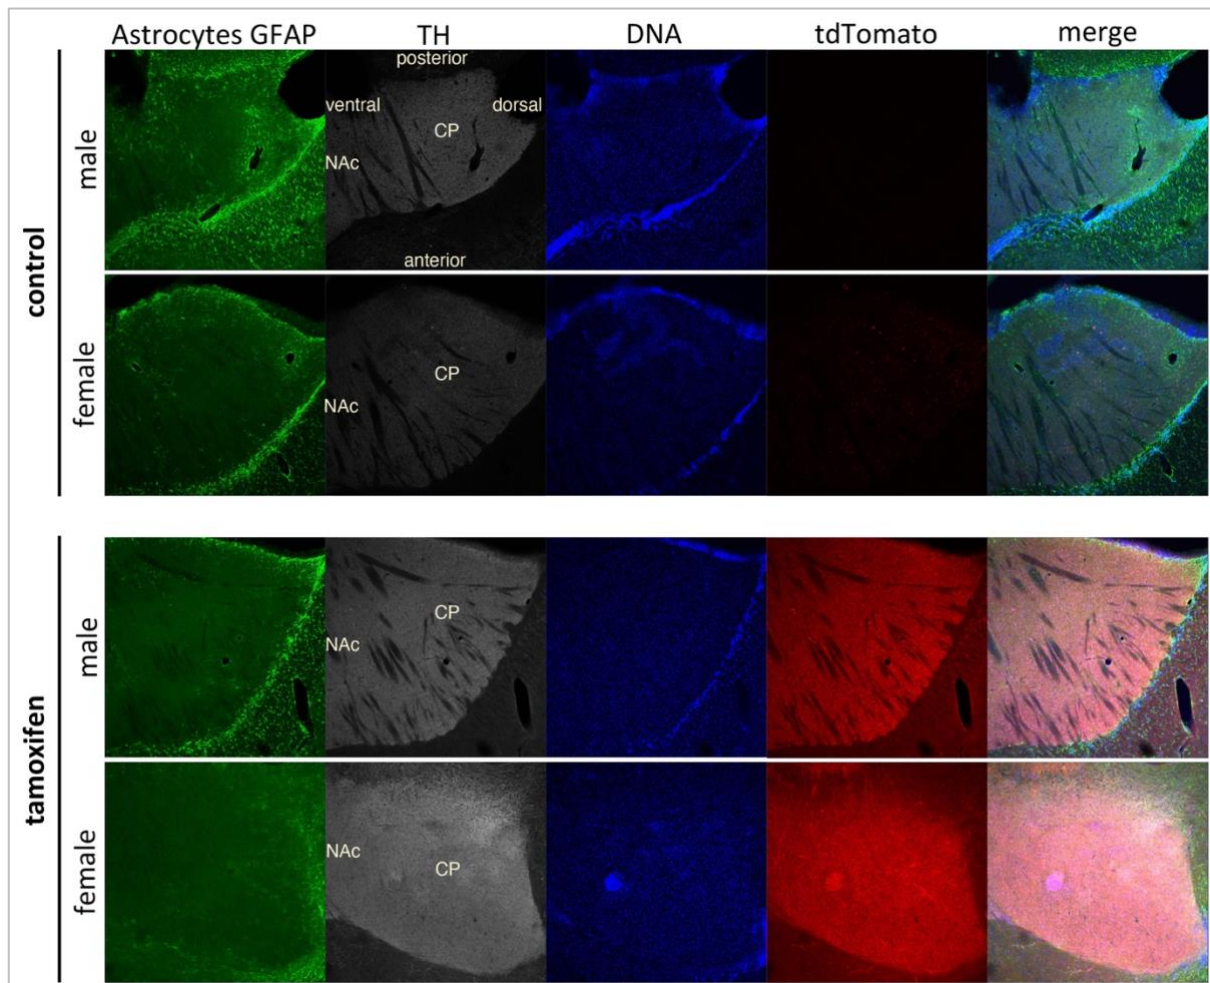

**Legend:** At Day 28 after tamoxifen injection, there was no evidence of increased gliosis at the axonal ends of tyrosine hydroxylase (TH)-positive dopaminergic neurons in the subortex (striatum: nucleus accumbens [NAc] and caudate putamen [CP]) of *Psmf1<sup>fl/fl</sup>* Ai14 UBC-Cre-ERT2 mice, as reflected by lack of immunoreactivity for glial fibrillary acidic protein (GFAP) in astrocytes and Iba1 in microglial cells. This could reflect that mice were sacrificed too early for dopaminergic neurons to exhibit pathological phenotype. Nuclei (DNA) were stained with Hoechst 33342 (blue). TdTomato (red) fluorescence was used as indicator of recombination efficiency.

**Supplementary File 9. List of primers used for the splicing (minigene) assay of *PSMF1* variants c.365+2T>C and c.605+1G>A (NM\_006814.5)**

| <b>Primer name</b>     | <b>Primer sequence (5'-3')</b>  | <b>Purpose</b>                    |
|------------------------|---------------------------------|-----------------------------------|
| hu_PSMF1_Ex3_XhoI_F    | aattctcgagATCTCCGTGTTGCTCACCTG  | Amplification of gDNA and cloning |
| hu_PSMF1_Ex3_BamHI_R   | attggatccGTGGACTCTTGA CTGCACCA  | Amplification of gDNA and cloning |
| hu_PSMF1_Ex5_XhoI_F    | aattctcgagTAGGTTTGTGTTC CGCCCTT | Amplification of gDNA and cloning |
| hu_PSMF1_Ex5_BamHI_R   | attggatccACCGGAAATGGCAGAAGAG    | Amplification of gDNA and cloning |
| PSMF1 c.365+2T_C Mut F | CTTCCACAGGcACTTCTAAATGATGTC     | Site-directed mutagenesis         |
| PSMF1 c.365+2T_C Mut R | TCACCCAGGTGTTCTGCA              | Site-directed mutagenesis         |
| PSMF1 c.605+1G_A Mut F | ACCCTTTTGGaTGAGTACTGC           | Site-directed mutagenesis         |
| PSMF1 c.605+1G_A Mut R | CTAAGTCTTCTCCCCCGA              | Site-directed mutagenesis         |
| SD6 F                  | TCTGAGTCACCTGGACAACC            | Colony PCR and RT-PCR             |
| SA2 R                  | ATCTCAGTGGTATTTGTGAGC           | RT-PCR                            |

**Legend:** gDNA = genomic DNA; PCR = polymerase chain reaction; RT-PCR = real-time (RT) PCR.

**Supplementary File 10. CURTAIN web links to proteomics datasets**

| <b>Figure</b> | <b>Comparison</b>                                       | <b>CURTAIN Web Link</b>                                                                                                                             |
|---------------|---------------------------------------------------------|-----------------------------------------------------------------------------------------------------------------------------------------------------|
| 3a            | Splice Homozygote vs HC                                 | <a href="https://curtain.proteo.info/#/d12eee39-b848-45db-97e9-80e1ed23d4d2">https://curtain.proteo.info/#/d12eee39-b848-45db-97e9-80e1ed23d4d2</a> |
| 3b            | Splice Homozygote vs Missense Homozygote                | <a href="https://curtain.proteo.info/#/96fc3542-f142-4314-b536-63b0ff2a6ebc">https://curtain.proteo.info/#/96fc3542-f142-4314-b536-63b0ff2a6ebc</a> |
| 3c            | Missense Homozygote vs HC                               | <a href="https://curtain.proteo.info/#/35fdd2ac-0a93-427d-bac0-a54a90a9d67e">https://curtain.proteo.info/#/35fdd2ac-0a93-427d-bac0-a54a90a9d67e</a> |
| 3d            | Missense Homozygote vs Unaffected Missense Heterozygote | <a href="https://curtain.proteo.info/#/393aec7f-1790-466a-abc2-23b8c91af443">https://curtain.proteo.info/#/393aec7f-1790-466a-abc2-23b8c91af443</a> |

**Legend:** HC = healthy controls.

### Supplementary references

1. Quinodoz, M. *et al.* AutoMap is a high performance homozygosity mapping tool using next-generation sequencing data. *Nature Communications* **12**(2021).
2. Bycroft, C. *et al.* The UK Biobank resource with deep phenotyping and genomic data. *Nature* **562**, 203-209 (2018).
3. Iwaki, H. *et al.* Accelerating Medicines Partnership: Parkinson's Disease. Genetic Resource. *Mov Disord* **36**, 1795-1804 (2021).
